## CORRECTION

# Correction: A scoring system to effectively evaluate central nervous system tuberculosis in patients with miliary tuberculosis

The *PLOS ONE* Staff

## Notice of Republication

This article was republished on June 19, 2017, to correct an error that was introduced in the title during the typesetting process. The publisher apologizes for the error.

## Supporting information

**S1 File. Originally published, uncorrected article.**  
(PDF)

**S2 File. Republished, corrected article.**  
(PDF)

## Reference

1. Xiao Y, Yu S, Xue Q, Lang S, Sun J, Feng D, et al. (2017) A scoring system to effectively evaluate central nervous system tuberculosis in patients with miliary tuberculosis. *PLoS ONE* 12(5): e0176651. <https://doi.org/10.1371/journal.pone.0176651> PMID: 28531173

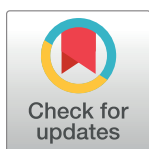

## OPEN ACCESS

**Citation:** The *PLOS ONE* Staff (2017) Correction: A scoring system to effectively evaluate central nervous system tuberculosis in patients with miliary tuberculosis. *PLoS ONE* 12(8): e0182713. <https://doi.org/10.1371/journal.pone.0182713>

**Published:** August 2, 2017

**Copyright:** © 2017 The PLOS ONE Staff. This is an open access article distributed under the terms of the [Creative Commons Attribution License](https://creativecommons.org/licenses/by/4.0/), which permits unrestricted use, distribution, and reproduction in any medium, provided the original author and source are credited.
